## *Inhalation Anesthetics and Cytochrome P-450-dependent Reactions in Rat Liver Microsomes*

Börje Hallén, M.D., and Gunnar Johansson, M.D.

The activities of liver microsomal enzymes were studied in preparations from unanesthetized rats and rats anesthetized for one hour with nitrous oxide, diethyl ether, halothane or chloroform. Most of the enzymes studied were cytochrome P-450-dependent oxygenases that hydroxylate endogenous substrates. The other microsomal enzymes, assayed for comparison, included the cytochrome P-450-dependent aminopyrine demethylase, glucose-6-phosphatase, a dehydrogenase, and NADPH-cytochrome P-450 reductase. No anesthetic was associated with a significant change in activity of any enzyme studied. In rats pretreated with phenobarbital no anesthetic except chloroform changed enzymic activity. All hydroxylations were inhibited markedly by chloroform, as were a microsomal dehydrogenation, hydrolysis of glucose-6-phosphate, and NADPH-cytochrome P-450 reductase activity. Administration of  $\alpha$ -tocopherol did not prevent the inhibition associated with chloroform in phenobarbital-induced animals.

It is concluded that cytochrome P-450-dependent hydroxylations involved in metabolic processes normally proceeding in the endoplasmic reticulum of the liver are not permanently affected by the anesthetics used in this study. The inhibitory effect of chloroform after pretreatment with phenobarbital is unspecific and affects a large number of different microsomal enzymes. Evidence that mechanisms other than lipid peroxidation may be responsible for the toxic effects of chloroform in the liver is presented. (Key words: Metabolism, hepatic microsomal; Liver, microsomes; Metabolism, cholesterol; Anesthetics, volatile, diethyl ether; Anesthetics, volatile, halothane; Anesthetics, volatile, chloroform; Anesthetics, gases, nitrous oxide.)

Received from the Departments of Anesthesiology and Surgery, Karolinska Sjukhuset, Stockholm, Sweden. Accepted for publication February 11, 1975. Supported by grants from the Swedish Medical Research Council (Project No. 03X-218) and Karolinska Institutet.

Address reprint requests to: Dr. Gunnar Johansson, Department of Surgery, Karolinska Sjukhuset, S-104 01 Stockholm 60, Sweden.

MOST INHALATION ANESTHETICS are metabolized by the microsomal drug-metabolizing enzyme system(s) in the liver.<sup>1,2</sup> This enzyme system contains cytochrome P-450 and NADPH-cytochrome P-450 reductase and requires NADPH and molecular oxygen. The system catalyzes hydroxylations of a large number of exogenous and endogenous, mainly lipid-soluble, compounds.<sup>1,2</sup> The metabolism of anesthetics in the microsomal fraction in some cases yields toxic metabolites. The formation of toxic metabolites has been suggested to explain the hepatotoxicity of chloroform and possibly halothane (cf. ref. 1). Prior administration of certain substrates increases the catalytic activity of the cytochrome P-450-dependent system. A potent inducing agent is phenobarbital. Variable but significant induction has also been shown for many inhalation anesthetics.<sup>1,2</sup>

There is at present no information concerning the effect of inhalation anesthetics on cytochrome P-450-catalyzed hydroxylations of endogenous substrates in the liver. The conversion of cholesterol into bile acids and the metabolism of bile acids involve a number of cytochrome P-450-dependent hydroxylations.<sup>3</sup> These reactions have been studied in considerable detail and are well suited to studies of the possible effects of inhalation anesthetics on metabolic processes in the microsomal fraction of liver. The present report describes the effect of short-term inhalation of several inhalation anesthetics in the rat on these cytochrome P-450-dependent hydroxylations. To provide a comparison with the drug-metabolizing enzyme system(s), the oxidative demethylation of aminopyrine was also studied. For comparison with cytochrome P-450-independent reactions a microsomal dehydrogenation and the hydrolysis of glucose-6-phosphate were

TABLE 1. Summary of Enzymes and Reactions Studied

| Enzyme System                                                               | Catalyzed Reaction                                                                                                                | Reference |
|-----------------------------------------------------------------------------|-----------------------------------------------------------------------------------------------------------------------------------|-----------|
| Cholesterol 7 $\alpha$ -hydroxylase                                         | Cholesterol $\rightarrow$ 5-cholestene-3 $\beta$ ,7 $\alpha$ -diol                                                                | 4-6       |
| 5 $\beta$ -Cholestane-3 $\alpha$ ,7 $\alpha$ -diol 12 $\alpha$ -hydroxylase | 5 $\beta$ -Cholestane-3 $\alpha$ ,7 $\alpha$ -diol $\rightarrow$ 5 $\beta$ -cholestane-3 $\alpha$ ,7 $\alpha$ ,12 $\alpha$ -triol | 7, 8      |
| 5 $\beta$ -Cholestane-3 $\alpha$ ,7 $\alpha$ -diol 26-hydroxylase           | 5 $\beta$ -Cholestane-3 $\alpha$ ,7 $\alpha$ -diol $\rightarrow$ 5 $\beta$ -cholestane-3 $\alpha$ ,7 $\alpha$ ,26-triol           | 9         |
| Lithocholate 6 $\beta$ -hydroxylase                                         | Lithocholate $\rightarrow$ 3 $\alpha$ ,6 $\beta$ -dihydroxy-5 $\beta$ -cholanoate                                                 | 10, 11    |
| Taurodeoxycholate 7 $\alpha$ -hydroxylase                                   | Taurodeoxycholate $\rightarrow$ taurocholate                                                                                      | 11, 12    |
| 5-Cholestene-3 $\beta$ ,7 $\alpha$ -diol 3 $\beta$ -dehydrogenase           | 5-Cholestene-3 $\beta$ ,7 $\alpha$ -diol $\rightarrow$ 7 $\alpha$ -hydroxy-4-cholesten-3-one                                      | 13        |
| Aminopyrine demethylase                                                     | Oxidative N-demethylation of aminopyrine                                                                                          | 14        |
| Glucose-6-phosphatase                                                       | Glucose-6-phosphate $\rightarrow$ glucose                                                                                         | 15        |
| NADPH-cytochrome P-450 reductase                                            | (Cytochrome P-450 complex)ox $\rightarrow$ (cytochrome P-450 complex)red                                                          | 16        |

assayed. Table 1 summarizes the reactions studied.

## Methods

### MATERIALS

[4-<sup>14</sup>C] Cholesterol (56  $\mu$ Ci/ $\mu$ mole, Radiochemical Centre, Amersham, England) was purified prior to use by chromatography on a column of aluminum oxide, grade III. The column was eluted with increasing concentrations of benzene in hexane. 5-[7 $\beta$ -<sup>3</sup>H] Cholestene-3 $\beta$ ,7 $\alpha$ -diol (8  $\mu$ Ci/ $\mu$ mole) was prepared according to the method of Danielsson and Einarsson.<sup>17</sup> 5 $\beta$ -[7 $\beta$ -<sup>3</sup>H] Cholestane-3 $\alpha$ ,7 $\alpha$ -diol (8  $\mu$ Ci/ $\mu$ mole) was prepared as described by Björkhem and Gustafsson.<sup>9</sup> [24-<sup>14</sup>C] Deoxycholic acid (0.3  $\mu$ Ci/ $\mu$ mole) was obtained from ICN (Irvine, Calif.), and tritium-labeled lithocholic acid (12  $\mu$ Ci/ $\mu$ mole) from NEN Chemicals (Dreieichenhain, Germany). Taurodeoxycholic acid was prepared from deoxycholic acid according to the method of Norman.<sup>18</sup> NAD, NADPH and  $\alpha$ -tocopherol were supplied by Sigma Chemical Co., St. Louis, Mo.

### ANIMAL EXPERIMENTS

Male Sprague-Dawley rats weighing about 150 g were used. They were fed a commer-

cial pellet food (Anticimex, Stockholm, Sweden) and tap water *ad libitum*. Conditions were optimized with respect to diurnal variations.<sup>19</sup> In experiments with phenobarbital-pretreated animals, phenobarbital (100 mg/kg body weight) in 1 ml saline solution was administered daily for 5 days. The animals were killed 24 hours after the last injection.  $\alpha$ -Tocopherol (70 mg/kg body weight) in 1 ml saline solution containing 16 per cent Tween 80 was given intraperitoneally 14 hours prior to sacrifice.

### ANESTHETIC PROCEDURES

The rats were anesthetized for one hour in groups of four in 8-l desiccators containing sodium hydroxide. Gas mixtures were delivered via a conventional anesthesia machine (AGA, Stockholm, Sweden) equipped with a calibrated Sorsil vaporizer,<sup>20</sup> and passed through the desiccator at a flow rate of 2.5 l/min for one hour. The rats were kept at a depth of anesthesia corresponding to stage 3, plane 1, by appropriate adjustment of the vapor concentration according to the vital signs of the rats.

The following gas mixtures were used: air, oxygen, nitrous oxide/oxygen 3:1, diethyl ether/air, halothane/oxygen and chloroform/oxygen.

## PREPARATION OF RAT LIVER MICROSOMES

Each animal was killed with a blow on the head and the liver was removed immediately. Liver homogenates, 20 per cent (w/v), were prepared in 0.25 M sucrose containing 0.001 M EDTA. The homogenate was centrifuged at  $20,000 \times g$  for 20 min. The microsomal fraction was obtained by centrifuging the  $20,000 \times g$  supernatant fluid at  $100,000 \times g$  for 1 hour. Microsomal suspension was prepared in 0.1 M potassium phosphate buffer, pH 7.0, containing 0.028 M nicotinamide. The volume of buffer added corresponded to the volume of the  $20,000 \times g$  supernatant fluid from which the microsomal fraction had been isolated.

## ASSAYS

**Cholesterol  $7\alpha$ -Hydroxylase Activity.** [ $4\text{-}^{14}\text{C}$ ] Cholesterol, 0.03  $\mu\text{mole}$  in 50  $\mu\text{l}$  of acetone, 3 ml microsomal suspension, and 3  $\mu\text{moles}$  NADPH in 2 ml buffer were incubated for 15 min at 37 C. Incubation was terminated by the addition of 20 volumes of chloroform/methanol (2:1, v/v). After filtration, 0.2 volumes of saline solution were added. The chloroform phase was collected and the solvent evaporated. The residue was subjected to thin-layer chromatography with benzene/ethyl acetate (8:3, v/v) as solvent. Extent of  $7\alpha$ -hydroxylation was calculated from scans of the chromatoplates with a radio scanner (Berthold, Karlsruhe, Germany).

**5-Cholestene- $3\beta,7\alpha$ -diol  $3\beta$ -Dehydrogenase Activity.** 5-[ $7\beta\text{-}^3\text{H}$ ] Cholestene- $3\beta,7\alpha$ -diol, 0.1  $\mu\text{mole}$  in 50  $\mu\text{l}$  of acetone, 1 ml microsomal suspension, and 1.3  $\mu\text{moles}$  of NAD in 2 ml buffer were incubated for 20 min at 37 C. Incubation was terminated and analyzed as described above, but with benzene/ethyl acetate (1:1, v/v) as solvent in thin-layer chromatography.

**$5\beta$ -Cholestane- $3\alpha,7\alpha$ -diol  $12\alpha$ -Hydroxylase and  $5\beta$ -Cholestane- $3\alpha,7\alpha$ -diol  $26$ -Hydroxylase Activities.**  $5\beta$ -[ $7\beta\text{-}^3\text{H}$ ] Cholestane- $3\alpha,7\alpha$ -diol, 0.6  $\mu\text{mole}$  in 50  $\mu\text{l}$  of acetone, 1.5 ml microsomal suspension, and 3  $\mu\text{moles}$  of NADPH in 1.5 ml buffer were incubated for 20 min at 37 C. Incubation was terminated and analyzed as described above with ethyl acetate as solvent in

thin-layer chromatography. The ratio between the two products,  $5\beta$ -cholestane- $3\alpha,7\alpha,12\alpha$ -triol and  $5\beta$ -cholestane- $3\alpha,7\alpha,26$ -triol, was determined by radio-gas chromatography with a Barber-Colman 5000 instrument equipped with a column of 3 per cent QF-1. Prior to radio-gas chromatography, the mixture was converted into the trimethylsilyl ether.

**Lithocholate  $6\beta$ -Hydroxylase Activity.** Tritium-labeled lithocholic acid, 0.2  $\mu\text{mole}$  in 50  $\mu\text{l}$  of acetone, 2 ml microsomal suspension, and 3  $\mu\text{moles}$  of NADPH were diluted with buffer to a final volume of 3 ml. In experiments with phenobarbital-treated rats, only 0.5 ml microsomal suspension was used. Incubation was carried out for 20 min at 37 C and terminated by the addition of 5 ml of 95 per cent (v/v) aqueous ethanol. After dilution with water and acidification, the mixture was extracted twice with ether. The combined ether extracts were washed with water until neutral and the solvent was evaporated. The residue was subjected to thin-layer chromatography in solvent system S 11.<sup>21</sup> The amount of product was calculated from the chromatoplates as described above.

**Taurodeoxycholate  $7\alpha$ -Hydroxylase Activity.** [ $24\text{-}^{14}\text{C}$ ] Taurodeoxycholic acid, 0.2  $\mu\text{mole}$  in 0.1 ml buffer, 0.5 ml microsomal suspension, and 3  $\mu\text{moles}$  of NADPH in 2.5 ml buffer were incubated for 20 min at 37 C. Incubation was terminated by the addition of 5 ml of 95 per cent (v/v) aqueous ethanol. The mixture was hydrolyzed with 1 M potassium hydroxide for 12 hours at 110 C. The hydrolyzed mixture was diluted with water, acidified, and extracted twice with ether. The combined ether extract was analyzed as described for incubations with lithocholic acid.

**Aminopyrine Demethylase Activity.** Aminopyrine, 15  $\mu\text{moles}$ , and NADPH, 3  $\mu\text{moles}$  in 2.5 ml of buffer, were incubated with 0.5 ml microsomal suspension for 20 min at 37 C. Incubation was terminated by the addition of 0.38 ml of a 25 per cent (w/v) solution of zinc sulfate and 0.38 ml of a saturated solution of barium hydroxide. The amount of formaldehyde formed was measured according to the method of Nash.<sup>22</sup>

**Glucose-6-phosphatase Activity.** D-Glucose-6-phosphate, 8  $\mu\text{moles}$  in 0.75 ml

TABLE 2. Effects of Inhalation Anesthetics on Enzymic Activity in Rat Liver Microsomes (Means  $\pm$  SEM)

| Reaction                                                                                          | Air             | Oxygen          | Sodium oxide    | Diethyl ether   | Halothane        | Chloroform       | Chloroform +<br>Tropolol* |
|---------------------------------------------------------------------------------------------------|-----------------|-----------------|-----------------|-----------------|------------------|------------------|---------------------------|
| <i>nmol of Producing Microsomal Protein</i>                                                       |                 |                 |                 |                 |                  |                  |                           |
| Cholesterol 7 $\alpha$ -hydroxylase                                                               |                 |                 |                 |                 |                  |                  |                           |
| Control                                                                                           | 0.05 $\pm$ 0.04 | 0.54 $\pm$ 0.03 | 0.48 $\pm$ 0.10 | 0.55 $\pm$ 0.03 | 0.55 $\pm$ 0.06  | 0.42 $\pm$ 0.07  | —                         |
| Phenobarbital-treated                                                                             | 0.12 $\pm$ 0.03 | 0.09 $\pm$ 0.01 | —               | 0.09 $\pm$ 0.01 | 0.12 $\pm$ 0.03  | 0.02 $\pm$ 0.01  | 0.03 $\pm$ 0.01           |
| 5-Cholestene-3 $\beta$ , 7 $\alpha$ -diol 3 $\beta$ -dehydrogenase                                |                 |                 |                 |                 |                  |                  |                           |
| Control                                                                                           | 5.0 $\pm$ 0.6   | 5.2 $\pm$ 0.3   | 3.2 $\pm$ 0.5   | 5.7 $\pm$ 0.6   | 3.1 $\pm$ 0.4    | —                | —                         |
| Phenobarbital-treated                                                                             | 4.8 $\pm$ 0.3   | 4.1 $\pm$ 0.4   | 6.6 $\pm$ 0.9   | 4.2 $\pm$ 0.4   | 6.0 $\pm$ 1.0    | 1.1 $\pm$ 0.11   | 1.3 $\pm$ 0.11            |
| 5 $\beta$ -Cholestane-3 $\alpha$ , 7 $\alpha$ -diol 12 $\alpha$ -hydroxylase                      |                 |                 |                 |                 |                  |                  |                           |
| Control                                                                                           | 1.7 $\pm$ 0.3   | 1.8 $\pm$ 0.2   | 1.1 $\pm$ 0.2   | 1.4 $\pm$ 0.3   | 1.4 $\pm$ 0.3    | 1.6 $\pm$ 0.1    | —                         |
| Phenobarbital-treated                                                                             | 0.6 $\pm$ 0.2   | 0.4 $\pm$ 0.1   | 1.1 $\pm$ 0.3   | 0.4 $\pm$ 0.1   | (1.3 $\pm$ 0.11) | (0.3 $\pm$ 0.11) | (0.5 $\pm$ 0.11)          |
| 5 $\beta$ -Cholestane-3 $\alpha$ , 7 $\alpha$ -diol 26 $\alpha$ -hydroxylase                      |                 |                 |                 |                 |                  |                  |                           |
| Control                                                                                           | 1.6 $\pm$ 0.2   | 1.4 $\pm$ 0.3   | 1.4 $\pm$ 0.1   | 1.2 $\pm$ 0.1   | 0.9 $\pm$ 0.1    | 1.7 $\pm$ 0.1    | —                         |
| Phenobarbital-treated                                                                             | 1.1 $\pm$ 0.2   | 0.7 $\pm$ 0.1   | 0.6 $\pm$ 0.2   | 0.5 $\pm$ 0.1   | (1.3 $\pm$ 0.11) | (0.3 $\pm$ 0.11) | (0.5 $\pm$ 0.11)          |
| Lithocholate 6 $\beta$ -hydroxylase                                                               |                 |                 |                 |                 |                  |                  |                           |
| Control                                                                                           | 5.6 $\pm$ 0.3   | 6.7 $\pm$ 0.5   | 4.0 $\pm$ 0.4   | 7.1 $\pm$ 0.7   | 3.6 $\pm$ 0.6    | 5.2 $\pm$ 0.4    | —                         |
| Phenobarbital-treated                                                                             | 11.4 $\pm$ 0.5  | 10.4 $\pm$ 0.3  | 9.9 $\pm$ 0.8   | 11.1 $\pm$ 0.7  | 9.3 $\pm$ 0.5    | 2.2 $\pm$ 0.11   | 2.4 $\pm$ 0.21            |
| Tartronic acid 7 $\alpha$ -hydroxylase                                                            |                 |                 |                 |                 |                  |                  |                           |
| Control                                                                                           | 10.1 $\pm$ 1.5  | 8.1 $\pm$ 1.0   | 9.4 $\pm$ 2.1   | 7.8 $\pm$ 0.8   | 6.5 $\pm$ 1.2    | 10.0 $\pm$ 0.3   | —                         |
| Phenobarbital-treated                                                                             | 33.2 $\pm$ 3.4  | 31.6 $\pm$ 3.7  | 33.6 $\pm$ 4.4  | 24.3 $\pm$ 1.8  | 42.2 $\pm$ 6.1   | 9.4 $\pm$ 1.31   | 8.3 $\pm$ 0.51            |
| <i>nmol of Formaldehyde Microsomal Protein</i>                                                    |                 |                 |                 |                 |                  |                  |                           |
| Ammonium demethylase                                                                              |                 |                 |                 |                 |                  |                  |                           |
| Control                                                                                           | 54 $\pm$ 5      | 51 $\pm$ 2      | 56 $\pm$ 3      | 53 $\pm$ 4      | 44 $\pm$ 4       | 49 $\pm$ 5       | —                         |
| Phenobarbital-treated                                                                             | 172 $\pm$ 11    | 170 $\pm$ 6     | 142 $\pm$ 14    | 138 $\pm$ 4     | 153 $\pm$ 3      | 59 $\pm$ 41      | 53 $\pm$ 21               |
| <i>nmol of Phosphate Microsomal Protein of the 20,000 <math>\times</math> g Supernatant Fluid</i> |                 |                 |                 |                 |                  |                  |                           |
| Glucose-6-phosphatase                                                                             |                 |                 |                 |                 |                  |                  |                           |
| Phenobarbital-treated                                                                             | 461 $\pm$ 17    | —               | —               | —               | —                | 385 $\pm$ 161    | 219 $\pm$ 561             |
| <i>nmol of reduced Cytochrome c hain <math>\times</math> mg Microsomal Protein</i>                |                 |                 |                 |                 |                  |                  |                           |
| NAD(P)-cytochrome P-450 reductase                                                                 |                 |                 |                 |                 |                  |                  |                           |
| Phenobarbital-treated                                                                             | 51 $\pm$ 2      | —               | —               | —               | —                | 29 $\pm$ 31      | 23 $\pm$ 21               |

\* Rats pretreated with  $\alpha$ -tocopherol.†  $P < 0.01$  in comparison with rats kept in air.The total amounts of 5 $\beta$ -cholestane-3 $\alpha$ , 7 $\alpha$ , 12 $\alpha$ -triol and 5 $\beta$ -cholestane-3 $\alpha$ , 7 $\alpha$ , 26 $\alpha$ -triol that were formed.

0.032 M potassium citrate solution, pH 6.5, was incubated with 0.25 ml 20,000  $\times$  g supernatant fluid for 30 min at 30 C. Incubation was terminated with 4 ml of 0.35 M perchloric acid. The amount of phosphate formed was measured according to the method of Gomori.<sup>22</sup>

**NADPH-Cytochrome P-450 Reductase Activity.** This activity was determined as described by Masters *et al.*<sup>24</sup>

**Protein and Cholesterol Concentrations.** Protein was determined according to the method of Lowry *et al.*<sup>25</sup> and cholesterol according to the method of Hanel and Dam.<sup>26</sup>

## Results

Table 2 summarizes the effects of one hour of anesthesia with nitrous oxide, diethyl ether, halothane, or chloroform on hydroxylations in the biosynthesis and metabolism of bile acids in untreated and phenobarbital-treated rats. For comparison, the oxidative demethylation of aminopyrine, the oxidation of a  $\Delta^5$ - $3\beta$ -hydroxysteroid, and the hydrolysis of glucose-6-phosphate were also assayed. In rats not pretreated with phenobarbital, no significant change in any of the reactions studied was observed. In rats pretreated with phenobarbital, nitrous oxide, diethyl ether and halothane had no significant effect, whereas with chloroform marked inhibition of all reactions was observed. Treatment with  $\alpha$ -tocopherol did not prevent the effect of chloroform.

## Discussion

The microsomal fraction of liver contains an enzyme system that catalyzes the hydroxylation of a large number of lipid-soluble compounds. The enzyme system consists of an electron-carrier chain containing NADPH-cytochrome P-450 reductase and cytochrome P-450. It requires reduced nicotinamide adenine dinucleotide phosphate (NADPH) and molecular oxygen. In addition to drugs, including many anesthetics, hydrocarbons, fatty acids, steroid hormones and bile acids are hydroxylated by this system.<sup>1-3</sup> The microsomal fraction of liver also contains enzyme systems with a similar electron-carrier chain and require-

ment of NADPH and oxygen, which are involved in the biosynthesis of bile acids.<sup>3</sup> The differences between these enzymes and the drug-metabolizing enzyme system consist of differing responses to treatment *in vivo* with phenobarbital, to biliary drainage, to treatment with cholestyramine, and to the presence of an isotope effect in the hydroxylation.<sup>2,27</sup> The participation of a cytochrome P-450 is well established, and it has been suggested that the specific properties of these enzyme systems are due to differences in cytochrome P-450.<sup>3-9</sup>

Since there is a common requirement for a number of factors in the metabolism of anesthetics, as well as in the formation and metabolism of bile acids, it is conceivable that anesthetics during anesthesia may inhibit a number of the cytochrome P-450-dependent reactions normally occurring in the liver. The present study does not answer the question whether such inhibition occurs *in vivo* during anesthesia, since much of the anesthetic is removed during preparation of the microsomal fraction. The activity of the enzyme systems catalyzing the hydroxylations in biosynthesis and metabolism of bile acids varies under normal conditions. For instance, the activity of the rate-limiting enzyme, cholesterol 7 $\alpha$ -hydroxylase, shows large diurnal variations.<sup>19</sup> Thus, the inhibition, if any, of these enzyme systems during anesthesia for a few hours might be of minor biologic significance provided it is easily reversible at the end of anesthesia. The present results obtained in livers removed from rats immediately after acute exposure for one hour to anesthetic concentrations of nitrous oxide, diethyl ether, halothane, and chloroform show that a number of cytochrome P-450 hydroxylations involved in the formation and metabolism of bile acids were unaffected. The activity of NADPH-cytochrome P-450 reductase and the drug-metabolizing enzyme system measured by the oxidative N-demethylation of aminopyrine were also unchanged. It has been reported that anesthetics might alter the amount of cytochrome P-450 following long-term exposure.<sup>28-31</sup> There is no information concerning the effect of acute exposure. If acute exposure led to decrease of cytochrome

P-450, the activities of the cytochrome P-450-dependent enzyme systems assayed in this study probably would have been affected. In rats pretreated with phenobarbital, acute administration of carbon tetrachloride leads to a rapid breakdown of cytochrome P-450 within an hour.<sup>22</sup> Chloroform and possibly halothane, both of which are chemically closely related to carbon tetrachloride, have been reported to affect animals pretreated with phenobarbital differently from untreated animals.<sup>29,30,33-35</sup> In the present study, when the same hydroxylations were assayed in phenobarbital-treated rats exposed to the same inhalation anesthetics, no significant effects were observed except with chloroform. With chloroform marked inhibition of all reactions assayed was observed. Not only hydroxylations but also a microsomal dehydrogenation and the microsomal hydrolysis of glucose-6-phosphate were inhibited. This suggests that anesthesia with chloroform in rats pretreated with phenobarbital yields a general unspecific destruction of microsomal enzymes.

The hepatotoxicity of chloroform is well recognized, but the mechanisms are not fully understood. There is evidence that a major effect of chloroform is stimulation of endogenous lipid peroxidation.<sup>36,37</sup> The mechanism of this effect is probably formation of radicals from chloroform by the drug-metabolizing enzyme system. Since the activity of this system is stimulated by pretreatment with phenobarbital, the formation of chloroform radicals is greater in phenobarbital-treated than in untreated animals. Some of the results of the present studies appear relevant to the question of the mechanism by which chloroform exerts its toxic effect. Cholesterol is very sensitive to lipid peroxides. Under conditions of lipid peroxidation in microsomes, endogenous cholesterol is oxidized nonenzymatically and the enzymatic 7 $\alpha$ -hydroxylation of cholesterol is inhibited.<sup>5</sup> In the present experiments, the 7 $\alpha$ -hydroxylation of cholesterol was unaffected by chloroform in untreated rats and inhibited strongly in phenobarbital-treated rats. Even if the rate of lipid peroxide formation during exposure to chloroform is higher in phenobarbital-treated rats than in

untreated rats, it appears unlikely that this is the entire explanation for the differing effects, since lipid peroxides have short half-lives and would probably have decomposed to a considerable extent during isolation of the microsomal fraction. These considerations indicate that the toxic effects of chloroform primarily occurred during the exposure. If these effects consisted of an increased production of lipid peroxides, one might expect an effect of  $\alpha$ -tocopherol.<sup>38</sup> However, no protective effect was obtained by pretreatment with  $\alpha$ -tocopherol. The conclusion that not only increased lipid peroxidation but also other mechanisms mediate chloroform toxicity has also been drawn by Brown, from a study in which the effects of halothane and chloroform on lipid peroxidation in phenobarbital-treated rats were compared.<sup>36</sup> Both anesthetics stimulated lipid peroxidation, to about the same extent, yet morphologic lesions of the liver were seen with chloroform only.

The authors acknowledge the skilful technical assistance of Mrs. Britt-Marie Johansson, Mrs. Angela Lannerbro, and Mr. Olle Falk.

## References

1. Brown BR Jr: Hepatic microsomal enzyme induction. *ANESTHESIOLOGY* 39:178-187, 1973
2. Remmer H: Induction of drug metabolizing enzyme system in the liver. *Eur J Clin Pharmacol* 5:116-136, 1972
3. Björkhem I, Danielsson H: Hydroxylations in biosynthesis and metabolism of bile acids. *Mol Cell Biochem* 4:79-95, 1974
4. Wada F, Hirata K, Nakao K, et al: Participation of the microsomal electron transport system involving cytochrome P-450 in 7 $\alpha$ -hydroxylation of cholesterol. *J Biochem (Tokyo)* 66:699-703, 1969
5. Johansson G: Oxidation of cholesterol, 3 $\beta$ -hydroxy-5-pregnen-20-one and 3 $\beta$ -hydroxy-5-androsten-17-one by rat liver microsomes. *Eur J Biochem* 21:68-79, 1971
6. Boyd GS, Grimwade AM, Lawson ME: Studies on rat-liver microsomal cholesterol 7 $\alpha$ -hydroxylase. *Eur J Biochem* 37:334-340, 1973
7. Einarsson K: On the properties of the 12 $\alpha$ -hydroxylase in cholic acid biosynthesis. *Eur J Biochem* 5:101-108, 1968
8. Bernhardsson C, Björkhem I, Danielsson H, et al: 12 $\alpha$ -Hydroxylation of 7 $\alpha$ -hydroxy-4-cholesten-3-one by a reconstituted system

- from rat liver microsomes. *Biochem Biophys Res Commun* 54:1030-1038, 1973
9. Björkhem I, Gustafsson J:  $\omega$ -Hydroxylation of steroid side-chain in biosynthesis of bile acids. *Eur J Biochem* 36:201-212, 1973
  10. Voigt W, Hsia SL, Cooper DY, et al: Photo-reactivation spectrum of the CO-inhibited taurochenodeoxycholate 6 $\beta$ -hydroxylase system. *FEBS Lett* 2:124-126, 1968
  11. Björkhem I, Danielsson H, Wikvall K: Hydroxylations of bile acids by reconstituted systems from rat liver microsomes. *J Biol Chem* 249:6439-6445, 1974
  12. Trülsch D, Greim H, Czygan P, et al: Cytochrome P-450 in 7 $\alpha$ -hydroxylation of taurochenodeoxycholic acid. *Biochemistry* 12:76-79, 1973
  13. Berséus O, Einarsson K: On the conversion of cholest-5-ene-3 $\beta$ ,7 $\alpha$ -diol to 7 $\alpha$ -hydroxycholest-4-en-3-one in rat liver homogenates. *Acta Chem Scand* 21:1105-1108, 1967
  14. Orrenius S: On the mechanism of drug hydroxylation in rat liver microsomes. *J Cell Biol* 26:713-723, 1965
  15. Wilgram GF, Kennedy EP: Intracellular distribution of some enzymes catalyzing reactions in the biosynthesis of complex lipids. *J Biol Chem* 238:2615-2619, 1963
  16. Levin W, Ryan D, West S, et al: Preparation of partially purified, lipid-depleted cytochrome P-450 and reduced nicotinamide adenine dinucleotide phosphate-cytochrome c reductase from rat liver microsomes. *J Biol Chem* 249:1747-1754, 1974
  17. Danielsson H, Einarsson K: On the conversion of cholesterol to 7 $\alpha$ ,12 $\alpha$ -dihydroxycholest-4-en-3-one. *J Biol Chem* 241:1449-1454, 1966
  18. Norman A: Preparation of conjugated bile acids using mixed carboxylic acid anhydrides. *Ark Kemi* 8:331-342, 1955
  19. Danielsson H: Relationship between diurnal variations in biosynthesis of cholesterol and bile acids. *Steroids* 20:63-72, 1972
  20. Hallén B, Norlander O: Performance of the AGA-Sorsil vaporizer for volatile anaesthetics studied by gas chromatography. *Acta Anaesthesiol Scand suppl* 26:43-52, 1966
  21. Eneroth P: Thin-layer chromatography of bile acids. *J Lipid Res* 4:11-16, 1963
  22. Nash T: The colorimetric estimation of formaldehyde by means of the Hantzsch reaction. *Biochem J* 55:416-421, 1953
  23. Gomori G: A modification of the colorimetric phosphorus determination for use with photoelectric colorimeter. *J Lab Clin Med* 27:955-960, 1942
  24. Masters BSS, Williams CH Jr, Kamin H: The preparation and properties of microsomal TPNH-cytochrome c-reductase from pig liver. *Methods Enzymol* 10:565-573, 1967
  25. Lowry OH, Rosebrough NJ, Farr AL, et al: Protein measurement with the Folin phenol reagent. *J Biol Chem* 193:265-275, 1951
  26. Hanel HK, Dam H: Determination of small amounts of total cholesterol by the Tschugaeff reaction with a note on the determination of lathosterol. *Acta Chem Scand* 9:677-682, 1955
  27. Johansson G: Studies on hydroxylations in biosynthesis and metabolism of bile acids. *Opuscula Medica suppl* 17:1-22, 1971
  28. Brown BR Jr, Sagalyn AM: Hepatic microsomal enzyme induction by inhalation anesthetics: Mechanism in the rat. *ANESTHESIOLOGY* 40:152-161, 1974
  29. Davis DC, Schroeder DH, Gram TH, et al: A comparison of the effects of halothane and CCl<sub>4</sub> on the hepatic drug metabolizing system. *J Pharmacol Exp Ther* 177:556-566, 1971
  30. Stenger RJ, Johnson EA: Effects of phenobarbital pretreatment on the response of rat liver to halothane administration. *Proc Soc Exp Biol Med* 140:1319-1324, 1972
  31. Reynolds ES, Moslen MT: Liver injury following halothane anesthesia in phenobarbital-pretreated rats. *Biochem Pharmacol* 23:189-195, 1974
  32. Levin W, Jacobson M, Kuntzman R: Incorporation of radioactive- $\delta$ -aminovaleric acid into microsomal cytochrome P<sub>450</sub>: Selective breakdown of the hemoprotein by allylpropylacetamide and carbon tetrachloride. *Arch Biochem Biophys* 148:262-269, 1972
  33. Scholler KL: Modification of the effects of chloroform on the rat liver. *Br J Anaesth* 42:603-605, 1970
  34. Almersjö O: Influence of halothane anesthesia on the normal liver and the liver subjected to partial hepatectomy or stimulated drug metabolism. A comparative study of the influence of halothane, gaseous carbon tetrachloride, chloroform and nitrous oxide in the rat. *Acta Chir Scand suppl* 216:1-83, 1971
  35. Barth ML, Cornish HH: The absence of effect of phenobarbital on halothane toxicity. *Res Commun Chem Pathol Pharmacol* 5:149-162, 1973
  36. Brown BR Jr: Hepatic microsomal lipoperoxidation and inhalation anesthetics: A biochemical and morphologic study in the rat. *ANESTHESIOLOGY* 36:458-465, 1972
  37. Slater TF, Sawyer BC: The stimulatory effects of carbon tetrachloride and other halogenoalkanes on peroxidative reactions in rat liver fractions *in vitro*. General features of the systems used. *Biochem J* 123:805-814, 1971
  38. Levin W, Lu AYH, Jacobson M, et al: Lipid peroxidation and the degradation of cytochrome P-450 heme. *Arch Biochem Biophys* 158:842-852, 1973
